# Supplementary material
Source: publisher site journal article supplement (https://www.dovepress.com/article/433269)
Supplement: Supplementary file 1 [file get_supplementary_file.php]

**Supplementary Table 1: Clinical characteristics of individual patients.**

| Subject ID | Clinical characteristics | | | | | | | COVID-19 vaccinations | | | | Sampling Interval from 3rd vaccination (days) | | | COPD-associated Medication |
| --- | --- | --- | --- | --- | --- | --- | --- | --- | --- | --- | --- | --- | --- | --- | --- |
| Age | Race | Gender | BMI (kg/m2) | Smoking Status | FEV1 % predicted | FEV1/FVC (%) | 1st | 2nd | 3rd | Days between 2nd and 3rd | Pre | 4-week post | 14-week post |
| 10864 | 64 | Caucasian | Female | 30.8 | Ex Smoker | 52.80% | 37.2 | Comirnaty | Comirnaty | Comirnaty | 206 | -33 | 23 | No sample | Ventolin, Fostair, Spiriva |
| 11133 | 75 | Caucasian | Female | 30.5 | Ex Smoker | 57.50% | 57.4 | Vaxzevria | Vaxzevria | Comirnaty | 187 | -2 | 25 | No sample | Ventolin, Symbicort, Braltus |
| 11655 | 74 | Caucasian | Male | 22.2 | Ex Smoker | 57.20% | 39.3 | Comirnaty | Comirnaty | Comirnaty | 201 | -7 | 21 | 92 | Ventolin, Ultibro |
| 19014 | 69 | Caucasian | Female | 23.8 | Current Smoker | 82.70% | 60.5 | Vaxzevria | Vaxzevria | Vaxzevria | 217 | -21 | 49 | 98 | Ventolin, Anoro Ellipta |
| 19781 | 73 | Caucasian | Male | 26.9 | Ex Smoker | 86.20% | 56.1 | Vaxzevria | Vaxzevria | Comirnaty | 201 | -12 | 21 | 92 | Ventolin |
| 20806 | 63 | Caucasian | Male | 22.3 | Ex Smoker | 90.90% | 54.9 | Vaxzevria | Vaxzevria | Comirnaty | 195 | -4 | 23 | 94 | Ventolin, Fostair |
| 24580 | 57 | Caucasian | Male | 18.6 | Current Smoker | 86.80% | 64.4 | Comirnaty | Comirnaty | Comirnaty | 208 | -13 | 29 | No sample | Ventolin, Fostair |
| 26249 | 56 | Caucasian | Male | 30.6 | Ex Smoker | 84.50% | 63.7 | Comirnaty | Comirnaty | Comirnaty | 180 | -1 | 21 | 103 | Ventolin, Trimbow |
| 26641 | 68 | Caucasian | Female | 28.9 | Ex Smoker | 73.00% | 62.5 | Vaxzevria | Vaxzevria | Comirnaty | 187 | -6 | 21 | 87 | Ventolin, Spiriva |
| 29647 | 69 | Caucasian | Female | 28.9 | Current Smoker | 43.50% | 41.1 | Vaxzevria | Vaxzevria | Comirnaty | 181 | -4 | 34 | 104 | Ventolin, Anoro Ellipta |
| 30115 | 69 | Caucasian | Male | 29.8 | Ex Smoker | 45.80% | 49.2 | Comirnaty | Comirnaty | Comirnaty | 214 | -23 | 31 | 96 | Ventolin, Revlar Ellipta, Spiriva |
| 31972 | 60 | Caucasian | Female | 38.2 | Current Smoker | 40.20% | 38.1 | Vaxzevria | Vaxzevria | Comirnaty | 225 | -24 | 24 | 97 | Ventolin, Trelegy Ellipta |

Abbreviations: COPD: Chronic obstructive pulmonary disease; BMI: body mass index; FEV1: first second of forced expiration; FVC: forced vital capacity
